# Supplementary material for: Early myopathy in Duchenne muscular dystrophy is associated with elevated mitochondrial H2O2 emission during impaired oxidative phosphorylation
Source: PubMed Central journal article supplement — J Cachexia Sarcopenia Muscle. 2019 Apr 2;10(3):643–61. doi: 10.1002/jcsm.12405 (PMC6596403; doi:10.1002/jcsm.12405), 2019-04-02
Supplement: JCSM-10-643-s001.pdf [file JCSM-10-643-s001.pdf]

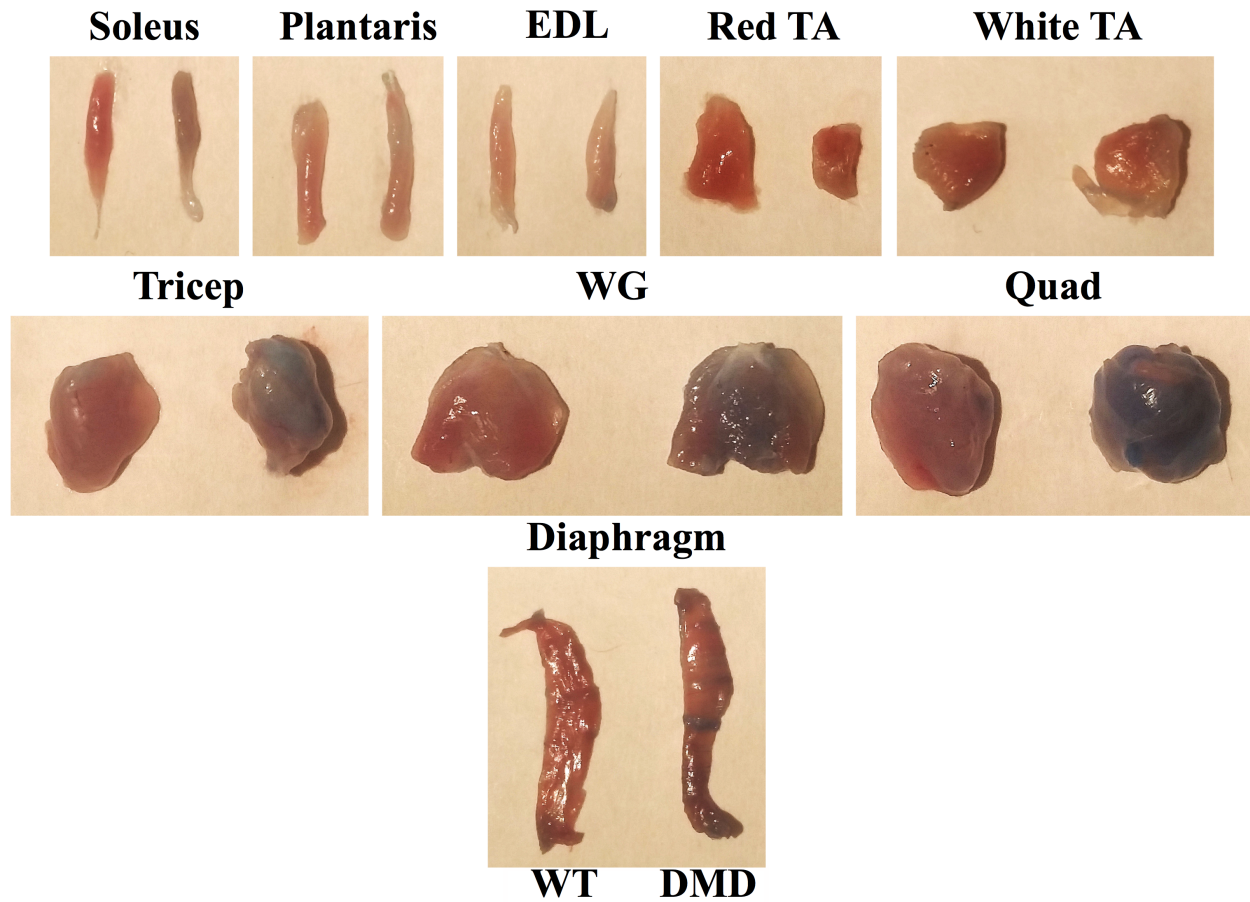

**Supplementary Figure 1. Evaluation of sarcolemmal damage by Evans Blue Dye staining in DMD.** Representative images of Evans Blue Dye staining in WT and DMD skeletal muscles 16 hours following an injection of 1% EBD solution at 5 $\mu$ l/g body weight.

## Complex I Supported Respiration (13.9mM PCr and 9.1mM Cr)

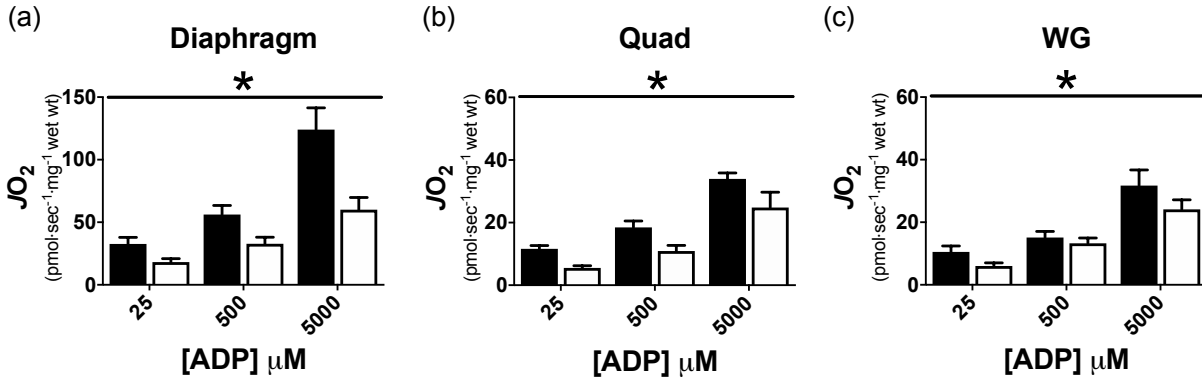

**Supplementary Figure 2. ADP-stimulated respiration in the presence of phosphocreatine and creatine.** 13.9mM phosphocreatine (PCr) and 9.1mM creatine (Cr) were added to the assay media to assess state III respiration supported by Complex-I substrates pyruvate (5mM) and malate (2mM) in Diaphragm (A), Quad (B) and WG (C). Results represent mean  $\pm$  SEM; n=10-12; \* p<0.05 compared to WT.

(a) Pyruvate + Malate Supported State II Respiration

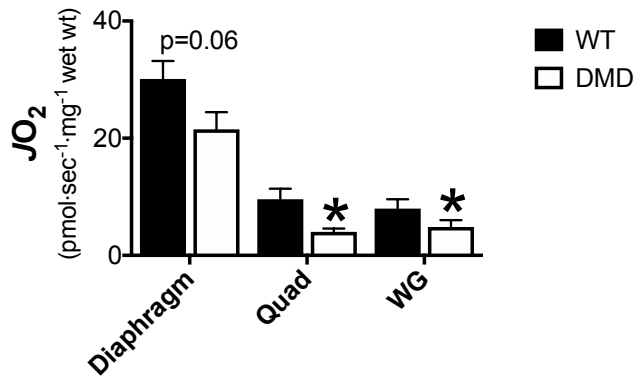

(b) Pyruvate + Malate Supported State II  $\text{mH}_2\text{O}_2$

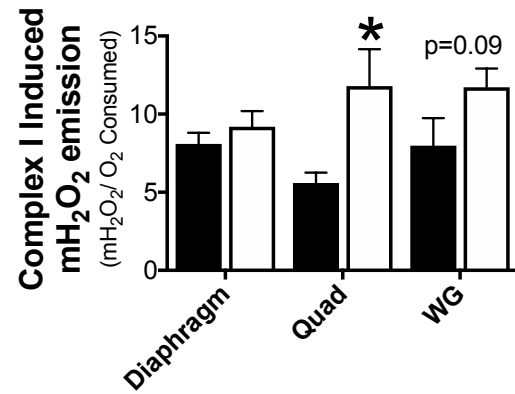

**Supplementary Figure 3. Evaluation of state II respiration and  $\text{mH}_2\text{O}_2$ .** State II (no ADP; proton leak) respiration (A) and  $\text{mH}_2\text{O}_2$  emission (B) were initiated using Complex-I substrates pyruvate (5mM) and malate (2mM) in Diaphragm, Quad and WG muscles. Results represent mean  $\pm$  SEM;  $n=10-12$ ;  $*$   $p<0.05$  compared to WT.

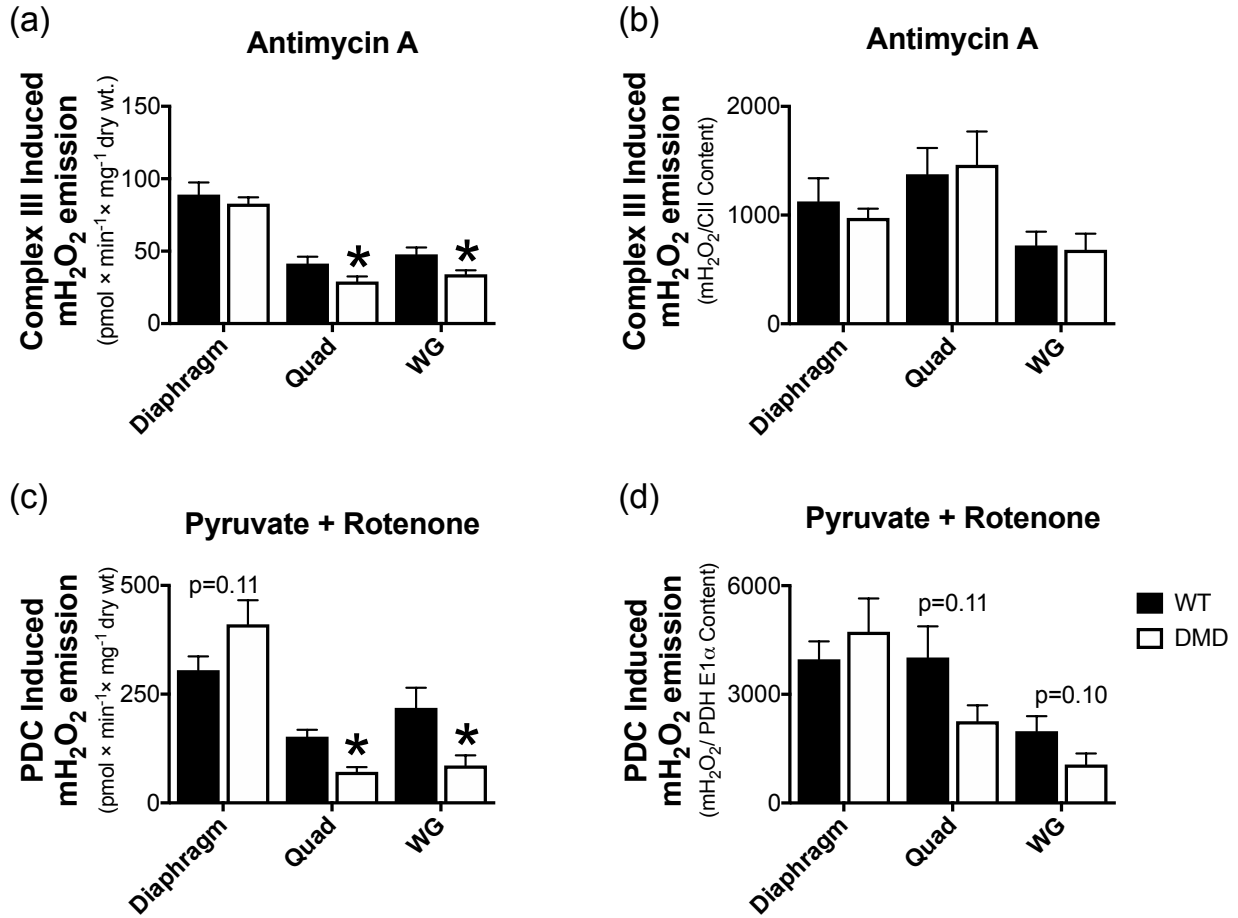

**Supplementary Figure 4. Additional sites of state II mH<sub>2</sub>O<sub>2</sub> emission.** Complex-III derived mH<sub>2</sub>O<sub>2</sub> was assessed using Complex-III inhibitor antimycin A (2.5μM). Data was expressed per mg muscle weight (A) as well as normalized to Complex-III content (B). Pyruvate dehydrogenase complex (PDC) derived mH<sub>2</sub>O<sub>2</sub> was assessed using pyruvate (10mM) and Complex-I inhibitor rotenone (0.5μM). Data was expressed per mg muscle weight (C) as well as normalized to PDH-E1α content (D). Results represent mean ± SEM; n=8-12; \* p<0.05 compared to WT.

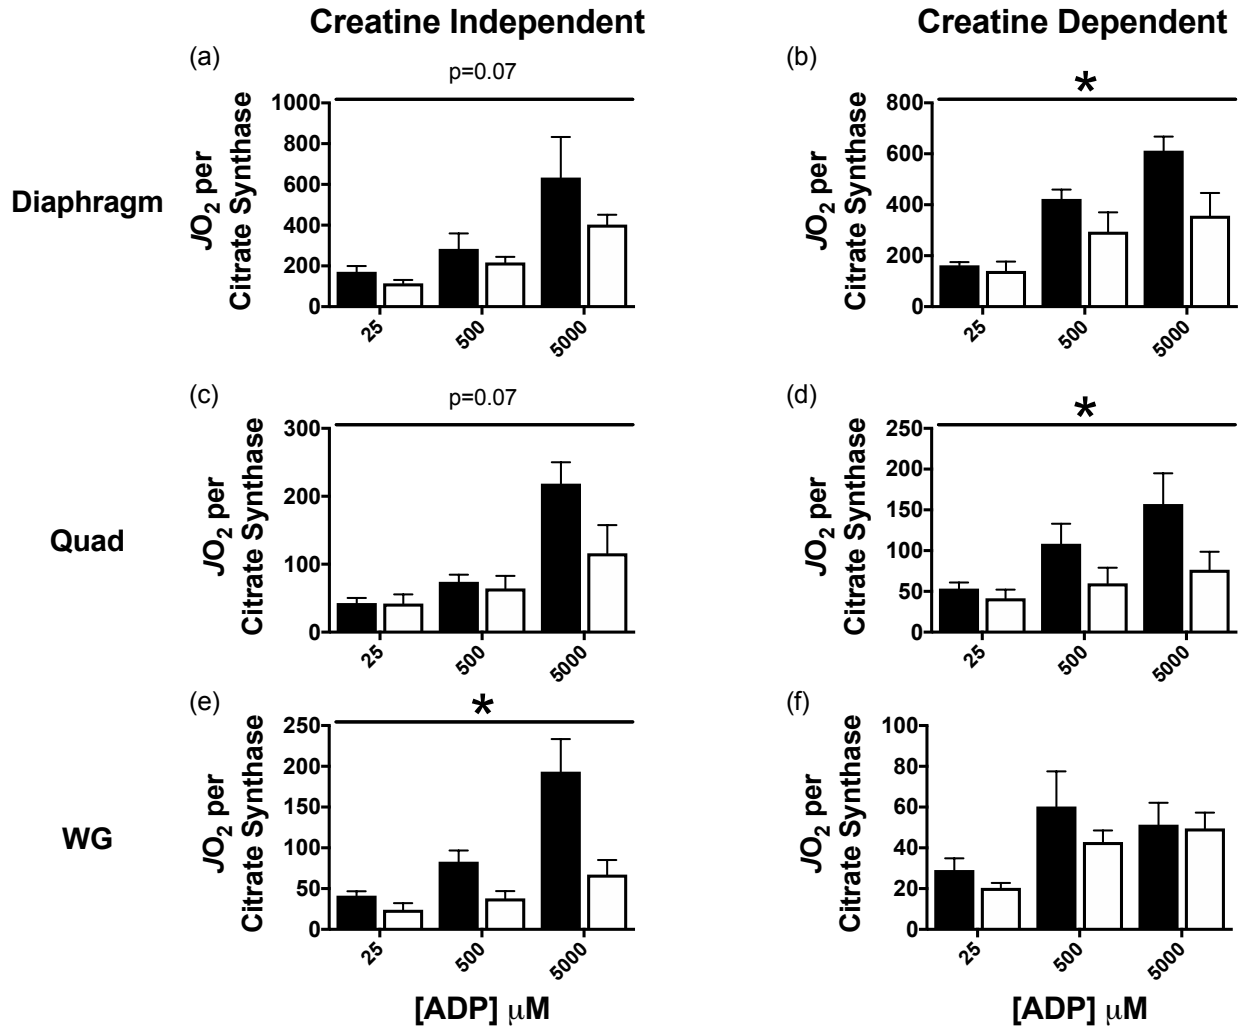

**Supplementary Figure 5. Intrinsic Respiratory Capacity.** State III respiration, supported by Complex-I substrates pyruvate (5mM) and malate (2mM), was assessed in the absence (Creatine Independent) and presence (Creatine Dependent) of 20mM creatine at physiological (25μM), sub-maximal (500μM) and maximal (5000μM) [ADP] and normalized to citrate synthase content. Assessments of bioenergetic function were completed in Diaphragm (a-b), Quad (c-d) and WG (e-f) muscles. Results represent means ± SEM; n=5-8; \* p<0.05 compared to WT.
